# Supplementary material
Source: MDPI journal article supplement (https://www.mdpi.com/2071-1050/9/7/1138)
Supplement: s1 [file s1]

Archive with 2 entries (2 files):
- SI_Impact Pathway Decision Making Matrix_20170618.xlsx
- Supporting information_20170618.pdf
