# Supplementary material
Source: MDPI journal article supplement (https://www.mdpi.com/2071-1050/9/7/1138)
Supplement: s1 [file s1 › SI_Impact Pathway Decision Making Matrix_20170618.xlsx]

## Sheet: Decision Making Matrix
	General information about the studies							Decision making matrix
	Title	Author	Source of noise*	Impacted species*	Impact pathway***	Location	Quantitative data available	Quality&quantity of data (weight: 3)	Increasing/decreasing emissions (weight: 1)	Modelling potential to PDF (weight: 5)	Final score
	An interim framework for assessing the population consequences of disturbance	King et al (2015)	Offshore wind farm construction	Harbour porpoises	Avoidance	North Sea	✓	4	3	5	4.44444
	Framework for assessing ecological and cumulative effects of offshore wind farms - Cumulative effects of impulsive underwater sound on marine mammals	TNO (2015)	Offshore wind farms	Harbour porpoises	Avoidance	North Sea	✓	4	3	5	4.44444
	Framework for assessing ecological and cumulative effects of offshore wind farms - Cumulative effects of impulsive underwater sound on marine mammals	TNO (2015)	Seismic surveying	Harbour porpoises	Avoidance	North Sea	✓	3	4	5	4.22222
	The effects of seismic airguns on cetaceans in UK waters	Stone and Tasker (2006)	Seismic activity	Several	Avoidance & Change in behaviour	United Kingdom	✓	4	4	4	4
	Killer whale presence in relation to naval sonar activity and prey abundance in northern Norway	Kuningas et al (2013)	Naval sonar	Orcas	Avoidance	Northern Norway	✓	3	4	4	3.66667
	Displacement of Orcinus orca (L.) by high amplitude sound in British Columbia, Canada	Morton (2002)	Acoustic harassment devices	Orcas	Avoidance	British Columbia, Canada	✓	3	3	4	3.55556
	Relationship between visual counts and call detection rates of gray whales (Eschrichtius robustus) in Laguna San Ignacio, Mexico	Ponce et al (2012)	Industrial noise	Gray whales	Avoidance	San Ignacio Bay, Mexico	✓	3	3	4	3.55556
	ICEBREAKER NOISE IN LANCASTER SOUND, N.W.T., CANADA: IMPLICATIONS FOR MARINE MAMMAL BEHAVIOR	Cosens and Dueck (1993)	Ship noise (icebreakers)	Belugas	Avoidance	high-Arctic	✓	1	5	4	3.11111
	Reactions of belugas and narwhals to ice-breaking ships in the Canadian high arctic	Finley et al (1990)	Ship noise (icebreakers)	Belugas	Avoidance	high-Arctic	✓	1	5	4	3.11111
	Reoccupation of Guerrero Negro, Baja California, Mexico, by gray whales	Bryant et al (1984)	Shipping noise & industrial noise	Gray whales	Avoidance	Baja California, Mexico	x	0	3	4	2.55556
	Joint Interim Report, Bahamas Marine Mammal Stranding, Event of 15-16 March 2000	NOAA et al. (2001)	Mid-frequency military sonar	Beaked whales, minke whales, spotted dolphin	Death by physical injury and/or stranding	Bahamas	✓	1	4	3	2.44444
	‘‘Gas and Fat Embolic Syndrome’’ Involving a Mass Stranding of Beaked Whales (Family Ziphiidae) Exposed to Anthropogenic Sonar Signals	Fernández et al (2005)	Mid-frequency military sonar	Beaked whales	Death by physical injury and/or stranding	Canary Islands, Spain	✓	1	4	3	2.44444
	Environment: Whale-call response to masking boat noise	Foote et al (2004)	Whale-watching boat noise	Orcas	Masking of communication	Washington State, US	✓	2	5	2	2.33333
	DOES INTENSE SHIP NOISE DISRUPT FORAGING IN DEEP-DIVING CUVIER’S BEAKED WHALES (ZIPHIUS CAVIROSTRIS)?	Aguilar Soto et al (2006)	Ship noise	Cuvier's beaked whale	Change in behaviour	Ligurian Sea	✓	3	5	1	2.11111
	EFFECTS OF WATERCRAFT NOISE ON THE ACOUSTIC BEHAVIOR OF BOTTLENOSE DOLPHINS	Buckstaff (2004)	Ship noise	Bottlenose dolphins	Masking of communication	Sarasota Bay, Florida, US	✓	3	5	1	2.11111
	THE EFFECT OF VESSEL NOISE ON THE VOCAL BEHAVIOR OF BELUGAS IN THE ST. LAWRENCE RIVER ESTUARY, CANADA	Lesage et al (1999)	Ship noise	Belugas	Masking of communication	St. Lawrence River, Canada	✓	3	5	1	2.11111
	Indication of a Lombard vocal response in the St. Lawrence River beluga	Scheifele et al (2005)	Ship noise	Belugas	Masking of communication	St. Lawrence River, Canada	✓	3	5	1	2.11111
	VOCAL RESPONSE OF LONG-FINNED PILOT WHALES (GLOBICEPHALA MELAS) TO MILITARY SONAR IN THE LIGURIAN SEA	Rendell and Gordon (1999)	Low-frequency sonar	Long-finned pilot whales	Masking of communication	Ligurian Sea	✓	3	4	1	2
	Evidence that ship noise increases stress in right whales	Rolland et al (2012)	Low-frequency ship noise	North Atlantic right whales	Increased stress levels	Bay of Fundy, Canada	✓	1	5	2	2
	Temporary threshold shift (TTS) in bottlenose dolphins (Tursiops truncatus) exposed to tonal signals	Finneran et al (2001)	Intense tones	Bottlenose dolphins	Temporary threshold shift (TTS)	Captivity	✓	3	3	1	1.88889
	Anthropogenic sound and marine mammal health: measures of the nervous and immune systems before and after intense sound exposure	Romano et al (2004)	Seismic sounds	Belugas	Increased stress levels	Captivity	✓	1	4	2	1.88889
	Whale songs lengthen in response to sonar	Miller et al (2000)	Sonar	Humpback whales	Masking of communication	-	✓	2	4	1	1.66667
	Report of the Scientific Committee. Annex K. Report of the Standing Working Group on Environmental Concerns.	IWC (2005)	Seismic activity	Sperm whales	Change in behaviour	-	x	0	4	1	1
											0
											0

## Sheet: References
Aguilar Soto, N., Johnson, M., Madsen, P. T., Tyack, P. L., Bocconcelli, A. and Fabrizio Borsani, J. (2006), DOES INTENSE SHIP NOISE DISRUPT FORAGING IN DEEP-DIVING CUVIER'S BEAKED WHALES (ZIPHIUS CAVIROSTRIS)?. Marine Mammal Science, 22: 690–699.
Bryant, P.J., C.M.Lafferty, S.K.Lafferty (1984): Chapter 15: Reoccupation of Guerrero Negro, Baja California, Mexico, by gray whales. In Jones, M.L, Sartz, S.L., Leatherwood, S (eds). The gray whale Eschrichtius robustus. Academic Press Inc.
Buckstaff, K. C. (2004), EFFECTS OF WATERCRAFT NOISE ON THE ACOUSTIC BEHAVIOR OF BOTTLENOSE DOLPHINS, TURSIOPS TRUNCATUS, IN SARASOTA BAY, FLORIDA. Marine Mammal Science, 20: 709–725
Cosens, S. E. and L. P. Dueck (1993). "ICEBREAKER NOISE IN LANCASTER SOUND, N.W.T., CANADA: IMPLICATIONS FOR MARINE MAMMAL BEHAVIOR." Marine Mammal Science 9(3): 285-300.
Fernández, A., J.F. Edwards, F. Rodríguez, A. Espinosa de los Monteros, P. Herráez, P. Castro, J.R. Jaber, V. Martín, and M. Arbelo. 2005. “Gas and fat embolic syndrome” involving a mass stranding of beaked whales (family Ziphiidae) exposed to anthropogenic sonar signals. Veterinary Pathology 42(4): 446–457.
Finley, K. J., G. W. Miller, R. A. Davis and C. R. Greene 1990. Reactions of belugas, Delphinapterus leucas, and narwhals, Monodon monoceros, to ice-breaking ships in the Canadian high arctic. Pages 97–117 in T. G.Smith, D. J. St.Aubin and J. R.Geraci, eds. Advances in research on the beluga whale, Delphinapterus leucas. Canadian Bulletin of Fisheries and Aquatic Sciences 224.
Finneran, J. J., D. A. Carder and S. H. Ridgway (2001). "Temporary threshold shift (TTS) in bottlenose dolphins (Tursiops truncatus) exposed to tonal signals." The Journal of the Acoustical Society of America 110(5): 2749-2749.
Foote, A. D., R. W. Osborne and A. R. Hoelzel (2004). "Environment: Whale-call response to masking boat noise." Nature 428(6986): 910-910.
IWC (2005): Report of the Scientific Committee. Annex K. Report of the Standing Working Group on Environmental Concerns. IWC/64/Rep1rev1. https://iwc.int/private/downloads/ciCERb3EeA_-RjsGkXuoQQ/64-Rep1rev1.pdf
King, S.L., R.S. Schick, C. Donovan, C.G. Booth, M. Burgman, L. Thomas, and J. Harwood. 2015. An interim framework for assessing the population consequences of disturbance. Ed. by Carolyn Kurle. Methods in Ecology and Evolution 6(10): 1150–1158.
Kuningas,S., P.H. Kvadsheim, F.A. Lam, P.J.O. Miller (2013): Killer whale presence in relation to naval sonar activity and prey abundance in northern Norway. ICES J Mar Sci 70 (7): 1287-1293
Lesage, V., Barrette, C., Kingsley, M. C. S. and Sjare, B. (1999), THE EFFECT OF VESSEL NOISE ON THE VOCAL BEHAVIOR OF BELUGAS IN THE ST. LAWRENCE RIVER ESTUARY, CANADA. Marine Mammal Science, 15: 65–84
Miller, P. J. O., N. Biassoni, A. Samuels and P. L. Tyack (2000). "Whale songs lengthen in response to sonar." Nature 405(6789): 903-903.
Morton, A.B., H.K. Symonds (2002): Displacement of Orcinus orca (L.) by high amplitude sound in British Columbia, Canada . ICES J Mar Sci 59 (1): 71-80
NOAA, Secretary of the Navy (2001): Joint Interim Report, Bahamas Marine Mammal Stranding, Event of 15-16 March 2000. http://www.nmfs.noaa.gov/pr/pdfs/health/stranding_bahamas2000.pdf
Ponce, D., A. M. Thode, M. Guerra, J. U. R. and S. Swartz (2012). "Relationship between visual counts and call detection rates of gray whales (Eschrichtius robustus) in Laguna San Ignacio, Mexico." The Journal of the Acoustical Society of America 131(4): 2700-2713.
Rendell, L. E. and Gordon, J. C. D. (1999), VOCAL RESPONSE OF LONG-FINNED PILOT WHALES (GLOBICEPHALA MELAS) TO MILITARY SONAR IN THE LIGURIAN SEA. Marine Mammal Science, 15: 198–204.
Rolland, R. M., S. E. Parks, K. E. Hunt, M. Castellote, P. J. Corkeron, D. P. Nowacek, S. K. Wasser and S. D. Kraus (2012). "Evidence that ship noise increases stress in right whales." Proceedings of the Royal Society B: Biological Sciences 279(1737): 2363-2368.
Romano, T.A., M.J. Keogh, C. Kelly, P. Feng, L. Berk, C.E. Schlundt, D.A. Carder, and J.J. Finneran. 2004. Anthropogenic sound and marine mammal health: measures of the nervous and immune systems before and after intense sound exposure. Canadian Journal of Fisheries and Aquatic Sciences 61(7): 1124–1134
Scheifele, P. M., S. Andrew, R. A. Cooper, M. Darre, F. E. Musiek and L. Max (2005). "Indication of a Lombard vocal response in the St. Lawrence River beluga." The Journal of the Acoustical Society of America 117(3): 1486-1492.
Stone, C.J., M.L. Tasker (2006): The effects of seismic airguns on cetaceans in UK waters. . J. CETACEAN RES. MANAGE. 8(3):255–263
TNO (2015): Framework for assessing ecological and cumulative effects of offshore wind farms - Cumulative effects of impulsive underwater sound on marine mammals. TNO report TNO 2015 R10335-A
